# Supplementary material
Source: Springer Nature journal article supplement (https://www.springerprofessional.de/resource/supplementary/13638_2014_999_MOESM3_ESM.pdf/11898978)

Antenna pattern 1

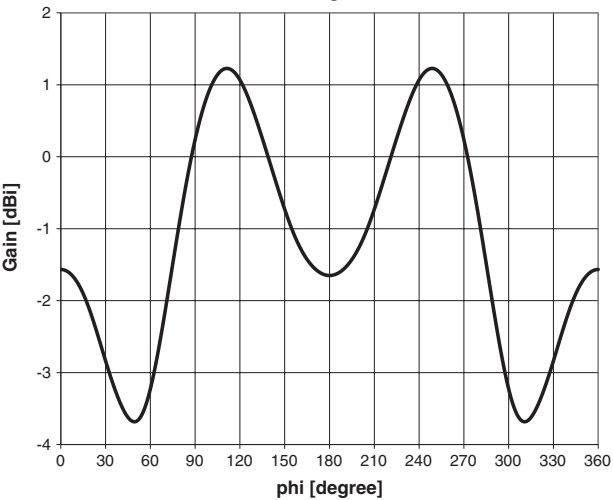

Antenna pattern 2

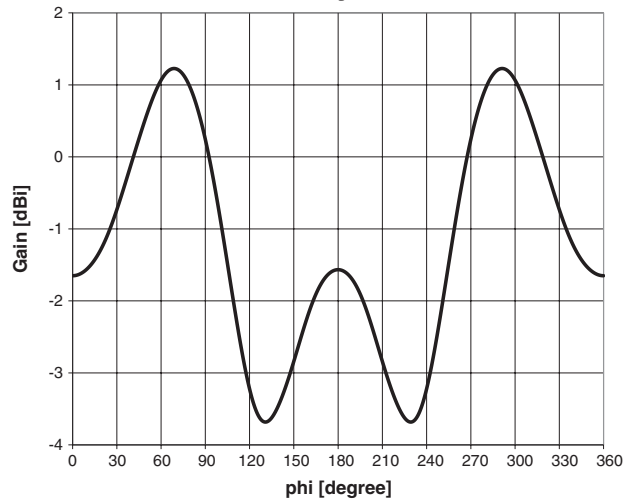

Beam pattern 1

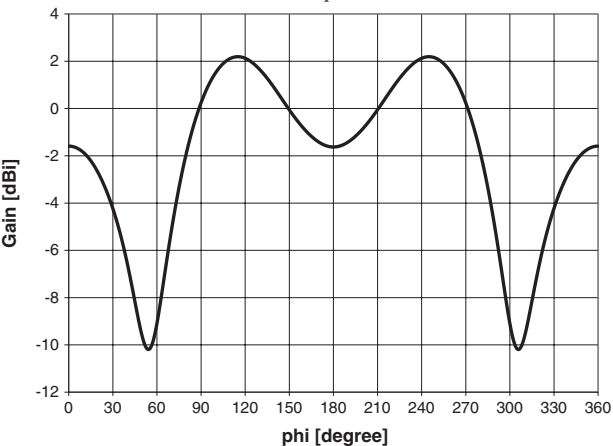

Beam pattern 2

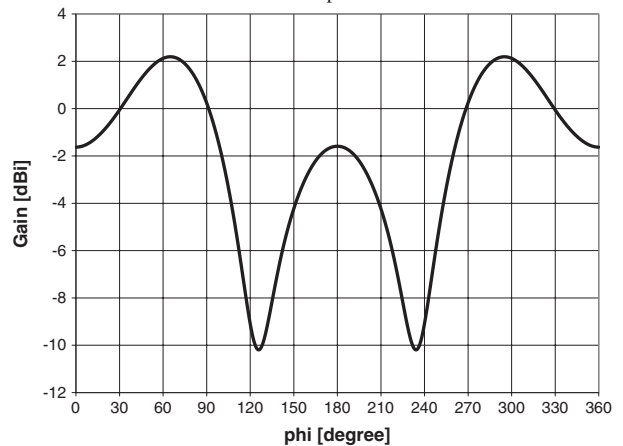

Supplement: MOESM3 [file 11898978]
